# Supplementary material for: Incidence, mortality, and predictive factors associated with acute respiratory distress syndrome in multiple trauma patients living in high-altitude areas: a retrospective study in Shigatse
Source: PeerJ. 2024 Jun 17;12:e17521. doi: 10.7717/peerj.17521 (PMC11188934; doi:10.7717/peerj.17521)
Supplement: Supplemental Information 1 [file peerj-12-17521-s001.xlsx]

## Sheet: Sheet1
ARDS	risk score	name	ASA	gender	age	height	smoking	chronic disease	Pulmonary complications before surgery	ISS	APACHE II	Craniocerebral trauma	Limb trauma	Thoracic injuries	Abdominal trauma	Time from injury to hospital（h）	Blood loss	Blood transfusion	Liquid transfusion	Urine (mL)	Mechanical ventilation in ICU	ICU days	In-hospital death
1	2.786	1	3	1	59	175	2	1	1	9	15	0	0	1	0	8					3	20	0
1	6.722	2	1	1	20	170	2	1	0	50	18	0	0	1	1	2					1	19	0
1	3.17	3	3	1	70	165	2	1	1	13	13	0	0	1	0	24					5	29	0
1	4.706	4	1	1	29	175	2	0	0	29	16	1	0	1	0	8						4	0
1	4.706	5	1	1	28	170	1	0	0	29	25	1	0	1	0	8	1300	1000	3000	3500	1	8	0
1	4.034	6	1	1	44	175	1	0	0	22	11	0	1	1	0	7					1	2	0
1	4.322	7	1	1	46	167	2	0	0	25	16	0	0	1	1	5	1800	600	4000	2476		2	0
1	5.57	8	1	1	56	166	2	0	0	38	19	1	1	1	0	12	600	300	1500	3000		4	0
1	4.322	9	1	1	48	175	2	0	0	25	18	0	0	1	1	8	2000		3000	1210		3	0
1	5.186	10	1	1	34	170	2	0	0	34	24	1	1	1	1	0.5	1400	900	500	700	2	6	0
1	5.186	11	1	1	63	175	2	0	0	34	29	1	1	1	0	24	1500		1500	1675	3	30	0
1	4.706	12	1	1	34	172	2	0	0	29	16	1	1	1	0	12	2000	400	2480	200	2	22	0
1	4.034	13	1	1	28	177	1	0	0	22	14	1	0	1	1	19	1500	300	2000	2257	1	7	0
1	3.842	14	1	1	40	168	2	0	0	20	20	0	0	1	0	9	1000	300	2000	2430	2	22	0
1	4.514	15	1	1	40	168	2	0	0	27	22	1	1	1	1	14	1400	500	5000	2100	2	28	0
1	4.706	16	1	1	38	170	2	0	0	29	18	1	1	1	0	5	500	200	2000	1540	1	3	0
1	5.186	17	1	1	36	173	2	0	0	34	3	0	0	1	1	4						6	0
1	4.994	18	1	1	20	173	2	0	0	32	26	1	0	1	0	5	300	250	2500	1800	2	14	0
1	3.746	20	1	1	36	172	2	0	0	19	12	0	0	1	1	20	2500	700	2254	2630		2	0
1	3.554	26	1	1	32	170	1	0	0	17	4	1	1	1	1	9					2	2	0
1	1.536	31	1	1	38	162	2	0	0	16	27	1	0	0	0	24	400	300	1500	1870	1	1	0
1	4.034	32	2	1	65	160	2	0	0	22	27	1	0	1	1	7					1	3	0
1	3.842	33	1	2	14	109	2	0	0	20	19	1	0	1	0	7					1	12	0
1	2.784	34	1	1	38	153	2	0	0	29	25	1	1	0	0	8					1	3	0
1	1.536	35	1	1	39	172	2	0	0	16	15	1	0	0	0	9					1	7	0
1	4.322	36	1	1	57	175	2	0	0	25	31	1	0	1	0	3	30	300	1500	2000	1	3	0
1	4.322	37	1	1	66	170	2	0	0	25	20	1	0	1	0	1	250	500	1700	2000	1	2	0
1	2.784	38	1	1	49	165	2	0	0	29	23	1	0	0	1	3	20		500	200	1	1	0
1	4.706	39	1	1	56	165	2	0	0	29	19	1	0	1	0	11	400	300	2500	2100	1	4	0
1	3.554	41	2	1	81	166	2	0	0	17	17	0	1	1	0	72					1	3	0
1	1.536	42	1	1	48	175	2	0	0	16	20	1	0	0	0	24	200	200	1500	2000	1	20	0
1	3.17	43	1	2	41	160	2	0	0	13	17	1	0	1	0	6	300	350	2200	3130	1	11	0
1	1.536	44	1	1	31	175	2	0	0	16	15	1	0	0	0	6	600	500	2500	4000	1	7	0
1	3.65	45	1	1	42	162	2	0	0	18	18	1	0	1	0	1	500	500	2200	2600	10	13	0
1	3.65	46	1	1	36	169	2	0	1	18	11	0	0	1	1	16	2000	900	2800	2800	5	11	0
1	3.554	47	1	1	65	173	2	0	0	17	15	0	0	1	0	6			1300	1800		16	0
1	2.786	48	1	1	31	162	2	0	0	9	22	0	0	1	0	24						19	0
1	3.65	49	1	2	46	165	2	0	0	18	7	0	0	1	1	5	500		3038	250	2	18	0
1	3.842	50	1	1	53	172	2	0	0	20	19	0	1	1	0	10	1000		5578	2588		5	0
1	4.034	52	2	1	59	174	2	1	0	22	16	1	1	1	0	7	500		1100	2280	1	1	0
1	2.784	53	2	1	71	173	2	1	1	29	37	1	0	0	1	3	1500		500	560	3	9	0
1	1.536	55	1	1	22	172	2	1	0	16	13	1	0	0	0	7					6	6	0
1	5.186	58	1	1	45	175	2	0	0	34	16	1	0	1	0	7	700	300	2000	3200	2	2	0
1	2.786	61	2	1	33	176	2	1	0	9	18	1	0	1	0	6					3	3	0
1	2.882	62	1	1	8	118	2	1	1	10	15	0	1	1	0	120						3	0
0	3.65	64	1	2	58	156	2	0	0	18	16	1	0	1	0	24					1	1	0
0	1.92	66	1	1	60	168	1	0	0	20		1	0	0	0	10					1	2	0
0	4.706	67	1	1	56	170	2	0	0	29	6	1	0	1	0	5					1	1	0
0	2.4	69	1	1	40	170	2	0	0	25	32	1	0	0	0	12	700	500	500	3900	1	8	0
0	0.864	70	1	1	58	170	1	0	0	9	16	1	0	0	0	14	400	400	2500	1300	1	5	0
0	2.592	71	1	1	28	176	2	0	0	27	25	1	0	0	0	4					1	13	0
0	0.96	72	1	1	61	169	2	0	0	10	25	1	0	0	0	7					1	1	0
0	3.842	73	1	1	51	175	2	0	0	20	23	1	0	1	0	1	700	550	220	4500	2	3	0
0	4.514	74	1	1	28	175	2	0	0	27	25	1	1	1	1	5	4500	1300	600	6770	1	2	0
0	3.17	75	1	1	34	170	2	0	0	13	8	0	0	1	1	4	3500	1250	800	1280	1	4	0
0	4.514	76	1	1	31	172	2	0	0	27	13	0	1	1	0	1							0
0	1.536	77	1	1	40	175	2	0	0	16	23	1	0	0	0	7	800	700	2500	1000	1	3	0
0	2.786	78	1	1	58	160	2	0	0	9	38	0	0	1	0	7					1	4	0
0	3.65	79	1	1	46	175	1	0	0	18	42	0	0	1	1	5	5800	1650	7000	8000	1	3	0
0	1.536	80	1	1	29	168	2	0	0	16	13	0	0	0	1	1	200		3000	4170	1	3	0
0	0.864	81	1	1	38	175	2	0	0	9	21	0	0	0	1	6	500	3000	3000	1500	9	17	0
0	3.554	82	1	1	64	173	1	0	0	17	27	0	1	1	1	10	1500		2500	1300		4	0
0	1.92	83	1	1	37	173	1	0	0	20	10	0	1	0	1	4	1100	1100	5000	1900		3	0
0	0.864	84	1	1	45	176	2	0	0	9	8	0	1	0	1	24	4000	1200	3000	2000	4	7	0
0	2.784	85	1	1	35	172	2	0	0	29	17	0	0	0	1	4	500	500	700	2830	1	4	0
0	3.65	86	1	1	24	178	2	0	0	18	22	0	0	1	1	6	500	400	1500	1460	1	6	0
0	3.264	87	1	1	25	168	2	0	0	34	15	1	0	0	1	6	2500	650	3000	345		30	0
0	4.034	88	1	1	50	175	2	0	0	22	7	1	1	1	0	20						6	0
0	0.864	89	1	1	28	173	2	0	0	9	16	0	1	0	0	1	1700	500	1600	1430	2	12	0
0	4.322	90	1	1	34	173	1	0	0	25	31	0	0	1	0	24	2000		1500	2000	2	22	0
0	2.784	91	1	1	49	170	2	0	0	29	24	1	0	0	0	10	500	300	2500	1620	1	28	0
0	1.536	92	1	1	39	176	2	0	0	16	23	1	0	0	0	8	700	500	2000	3620	1	21	0
1	5.186	93	1	1	66	170	2	0	0	34	34	1	0	1	0	7					1	14	0
1	4.706	94	2	1	76	169	2	0	0	29	33	1	0	1	0	8					1	12	0
0	0.864	95	1	1	57	165	2	0	0	9	15	1	0	0	0	1					1	12	0
0	4.706	96	1	1	41	127	2	0	0	29	20	1	1	1	0	6	400	300	2000	630	0	14	0
0	3.264	97	1	1	28	160	2	0	0	34	34	1	0	0	1	3	3500		2500		3	21	0
0	2.496	98	1	1	52	165	2	0	0	26	24	1	1	0	0	4					4	7	0
0	4.322	99	2	1	74	158	2	0	0	25	25	1	0	1	0	13			2300	3100	1	19	0
0	3.554	100	1	1	29	176	2	0	0	17	30	1	0	1	1	5	4500	1600	4796	3680		7	0
0	4.034	101	1	1	40	167	2	0	0	22	8	0	1	1	1	10	1000		4700	2700	1	11	0
0	0.864	102	1	1	45	169	2	0	0	9	28	0	0	0	1	3	5000	800	5000	1340	1	16	0
0	1.536	103	1	1	33	175	2	0	0	16	24	0	0	0	1	5	1500	500	43215	2134	1	11	0
0	3.458	104	1	1	57	165	2	0	0	16	13	0	0	1	0	8	2000		2000	1900		6	0
0	3.17	105	1	2	40	169	2	0	0	13	5	1	0	1	1	5						5	0
0	1.344	106	1	1	30	174	2	0	1	14	9	0	1	0	1	8	100		500	800		27	0
0	3.17	107	1	1	60	172	2	0	0	13	11	0	1	1	0	3	200		3700	2400	1	8	0
0	0.864	108	1	1	50	174	2	0	0	9	28	0	1	0	0	5	200	400	3750	2870	1	11	0
0	0.864	109	1	1	57	173	2	0	0	9	11	1	0	0	0	24						19	0
0	5.378	112	1	1	57	168	1	0	0	36	15	1	0	1	0	1	400	400	2500	1085	1	2	0
0	3.17	114	1	2	73	165	2	0	0	13	19	1	0	1	0	6	15		500	1000	5	5	0
0	1.536	115	1	1	35	165	2	0	0	16	10	1	0	0	0	8	350	250	2800	4470	2	2	0
0	1.536	116	1	2	5	70	2	0	0	16	31	1	0	0	0	96					20	21	0
0	0.864	118	1	1	47	169	2	0	0	9	31	1	0	0	0	5	500	700	2500	3000	2	31	0
0	4.226	120	1	1	50	166	2	0	0	24	18	1	0	1	1	3	600	500	1500	1355		9	0
0	4.034	121	1	1	50	150	2	0	0	22	22	1	0	1	0	3	20		500	1030	9	9	0
0	0.864	123	2	1	79	165	2	0	0	9	28	1	0	0	0	8	10		500	800	2	1	0
0	0.864	125	1	2	39	156	2	0	0	9	22	1	0	0	0	3	400	350	2000	1500	1	1	0
0	1.536	126	1	1	35	165	2	0	0	16	10	1	0	0	0	6	300	550	2000	700	14	14	0
0	3.65	127	1	1	43	166	2	0	0	18	16	1	0	1	0	9			1000	2310	9	9	0
0	0.864	128	1	1	51	165	2	0	0	9	17	1	0	0	0	6	300	300	2500	2370	9	9	0
0	1.632	129	1	2	49	162	2	0	0	17	21	1	1	0	1	1	300	300	2500	3000	1	2	0
0	1.536	130	1	1	61	156	2	0	0	16	27	1	0	0	0	2	500	300	1500	4000	1	16	0
0	3.266	131	1	1	24	170	2	0	0	14	7	1	0	1	0	10					2	13	0
0	0.864	132	1	1	20	170	2	0	0	9	11	1	0	0	0	0.5	150		2500	750		3	0
0	3.17	133	1	1	51	175	2	0	0	13	5	1	0	1	1	12	1100	1200	3800	3050	1	15	0
0	0.864	134	1	1	35	168	2	0	0	9	15	1	0	0	0	19	250	300	1300	2100	1	5	0
0	0.864	135	1	1	32	175	2	0	0	9	14	1	0	0	0	1	500	300	1500	700	1	16	0
0	0.864	136	1	1	35	180	2	0	0	9	16	1	0	0	0	5	200		1200	2000	2	12	0
0	1.248	137	2	2	71	156	2	0	0	13	20	1	0	0	0	4	600	900	2500	2500	1	8	0
0	0.864	138	1	1	55	170	2	0	0	9	18	1	0	0	0	1	200	300	1500	2250	1	5	0
0	0.864	139	1	1	5	104	2	0	0	9	21	0	0	0	1	2	750	200	812	280	1	7	0
0	3.458	140	1	1	47	173	2	0	0	16	15	0	0	1	1	5	2000	2200	4500	4000		6	0
0	4.034	141	1	1	32	167	2	0	0	22	20	0	0	1	1	10	4000	1200	4200	3000	1	2	0
0	0.864	142	1	1	45	172	2	0	0	9	27	0	0	0	1	12	1000		4472	2180	6	19	0
0	3.554	143	1	1	41	165	2	0	0	17	24	0	0	1	1	8	4500	600	4600	3050	1	17	0
0	3.65	144	1	1	31	170	2	0	0	18	18	0	0	1	1	7	4000	2000	3548	1400	1	1	0
1	4.706	145	1	1	55	162	2	0	1	29	25	0	1	1	1	13			2000	1862	3	5	0
0	1.248	146	1	1	22	147	2	0	0	13	5	0	1	0	1	2	700	550	2100	1500	1	2	0
0	0.864	147	1	1	54	172	2	0	0	9	22	0	1	0	0	5	500	100	2330	3800	9	12	0
0	1.632	148	1	1	56	176	2	1	0	17	9	1	1	0	0	12					2	3	0
0	0.864	149	1	1	71	170	2	1	0	9	25	1	0	0	0	1	600	800	2000	1800	1	12	0
0	2.306	150	2	1	69	160	2	1	0	4	5	0	0	1	0	2					1	11	0
0	0.864	151	2	1	56	170	1	1	0	9	24	0	0	0	1	9	800	800	3500	2000	1	2	0
0	4.034	152	3	1	58	168	2	1	0	22	28	1	1	1	1	3	300	250	1500		1	1	0
0	0.864	153	1	1	60	169	2	1	0	9	14	1	0	0	0	24					1	1	0
0	1.536	154	2	1	46	165	2	1	1	16	19	1	0	0	0	2	300	250	2500	3000	1	8	0
0	4.802	155	1	1	33	164	1	0	0	30	15	1	1	1	0	9	500	500	2000	1150	2	3	0
0	0.864	156	1	1	40	165	1	0	0	9	28	1	0	0	0	6					3	11	0
0	2.4	157	1	2	5	80	2	0	0	25	14	1	0	0	0	4	250	350	1000	630	1	1	0
0	1.92	158	1	2	19	165	2	0	0	20	6	1	1	0	0	9					1	6	0
0	1.824	159	2	1	67	170	2	1	1	19	14	1	1	0	0	8	30		1920	980	1	9	0
0	0.864	160	2	1	52	172	1	1	0	9	30	1	0	0	0	9	700	600	1500	490		9	0
0	1.536	161	2	1	39	175	2	1	0	16	20	1	0	0	0	10	200	300	2500	3200	2	2	0
0	1.536	162	2	1	26	170	2	1	0	16	13	1	0	0	0	3	500	500	1500	820	1	4	0
0	2.4	163	2	1	49	170	2	1	0	25	38	0	0	0	1	7	1000	800	2800	1300		1	0
0	1.536	164	2	1	51	170	2	1	1	16	18	1	0	0	0	6	300	300	1500	3500	1	2	0
1	4.034	165	1	1	3	75	2	0	0	22	25	1	0	1	0	1					5	5	0
0	0.864	166	1	1	4	75	2	0	0	9	17	0	0	0	1	4	480	100	1190	560	22	29	0
0	1.536	167	1	1	12	120	2	0	0	16	30	1	0	0	0	13						2	0
0	1.632	168	1	1	4	70	2	0	0	17	21	1	1	0	0	9					1	6	0
1	3.65	19	1	1	23	170	2	0	0	18	8	0	1	1	0	4						1	1
1	3.65	21	1	1			2	0	0	18	6	1	0	1	0	24	500		2000	1380	6	6	1
1	5.186	22	1	1	44	173	2	0	0	34	4	0	0	1	1	2	1000	500	1485	1600	32	32	1
1	3.458	23	1	1	50	175	1	0	0	16	22	0	0	1	0	12	1000		838	2201	3	3	1
1	5.186	24	1	1	42	171	2	0	0	34	25	1	1	1	1	7	300		1536	850		6	1
1	4.706	25	1	1	44	173	2	0	0	29	22	0	1	1	0	7	500		3075	3700		57	1
1	4.322	27	1	1	40	172	2	0	0	25	25	1	0	1	0	9	500	400	2500	1800	11	11	1
1	2.4	28	1	1	47	175	2	0	0	25	20	1	0	0	0	8					12	12	1
1	4.034	29	1	2	42	166	2	0	0	22	12	1	1	1	0	3	10		1068	1000	2	2	1
1	2.784	30	1	1	34	170	1	0	0	29	18	1	0	0	0	10	500	300	2000	1500	25	26	1
1	4.706	40	1	1	39	165	2	0	0	29	15	0	1	1	0	12					1	6	1
1	3.17	51	3	1	71	167	2	1	1	13	16	0	0	1	0	10					1	1	1
1	4.034	54	1	2	57	160	2	1	0	22	31	1	0	1	0	1	300	250	2500	3900	5	5	1
1	3.65	56	2	1	42	167	2	1	1	18	21	1	1	1	0	5					1	1	1
1	3.842	57	2	1	66	169	2	1	0	20	19	0	0	1	0	14	300		2000	4020	2	2	1
1	2.592	59	1	1	42	165	2	0	0	27	6	1	0	0	1	4	500	250	2500	4700	10	10	1
1	3.65	60	1	1	52	180	2	0	0	18	10	1	0	1	0	18					2	2	1
0	1.536	63	2	1	74	175	2	1	0	16	13	1	0	0	0	5	40		500	1500	1	1	1
0	0.864	65	1	2	39	163	2	0	0	9	26	1	0	0	0	5	600	400	2000	3050	11	10	1
0	2.4	68	1	1	49	156	2	0	0	25	19	1	0	0	0	3	400	300	2000	3350	9	9	1
0	0.864	110	1	1	49	168	1	0	0	9	24	1	0	0	0	3	700	500	2500	1000	1	1	1
0	3.554	111	1	1	55	175	1	0	0	17	19	1	0	1	0	10	5		500	1000	1	1	1
0	0.864	113	1	1	21	170	2	0	0	9	12	1	0	0	0	4	500	250	2000	400	1	1	1
0	0.864	117	1	1	27	172	2	0	0	9	15	0	0	0	1	3	800	300	2000	1500	5	5	1
0	3.65	119	1	1	43	170	2	0	0	18	21	1	0	1	0	6	700	600	2500	900		5	1
0	1.536	122	1	1	50	170	2	0	0	16	32	0	0	0	1	2	2000	400	5000	1770	2	2	1
0	2.4	124	1	1	53	165	2	0	0	25	15	1	1	0	1	5	400	300	2500	900	2	14	1
